# Supplementary figures and images for: Association between D-dimer concentrations and Glasgow Coma Scale in patients with hemorrhagic stroke
Source: Research Square preprint supplement (doi:10.21203/rs.3.rs-3063982/v1), 2024-03-06

**A**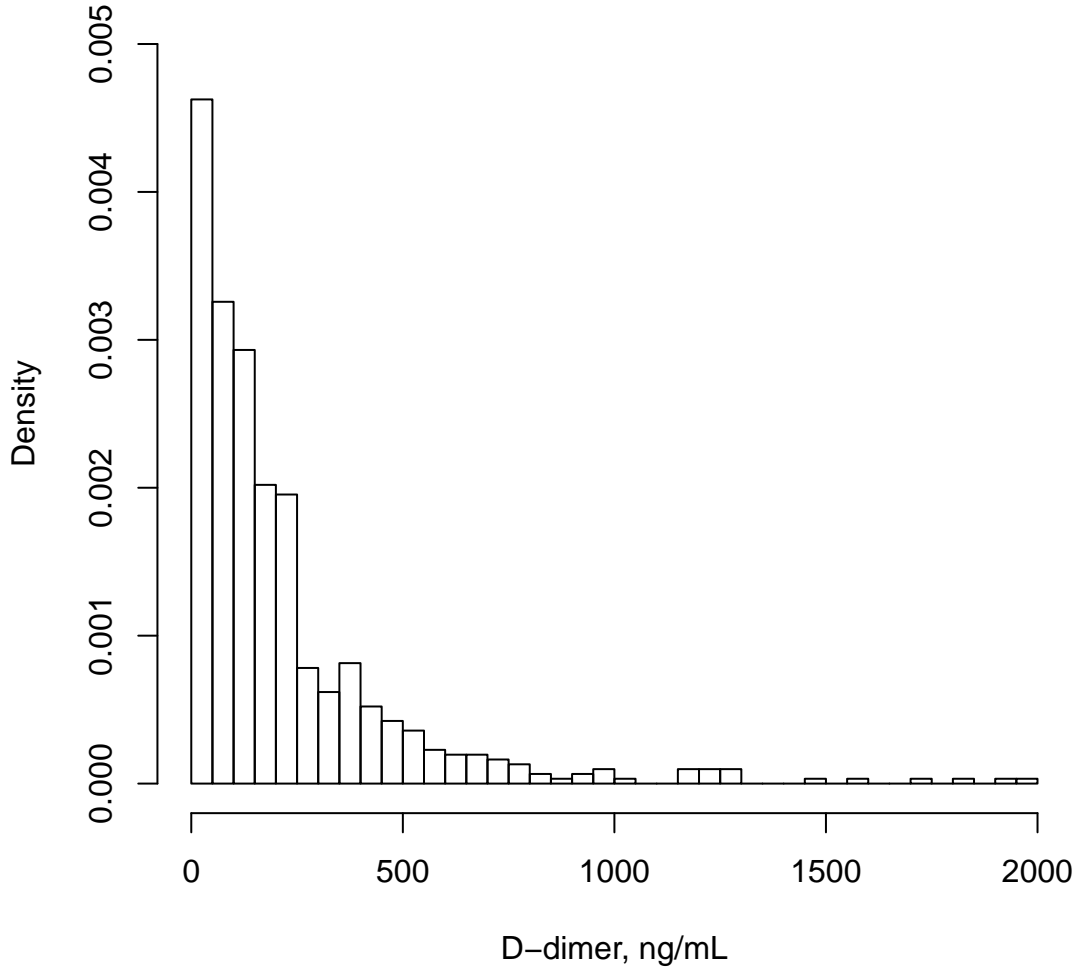**B**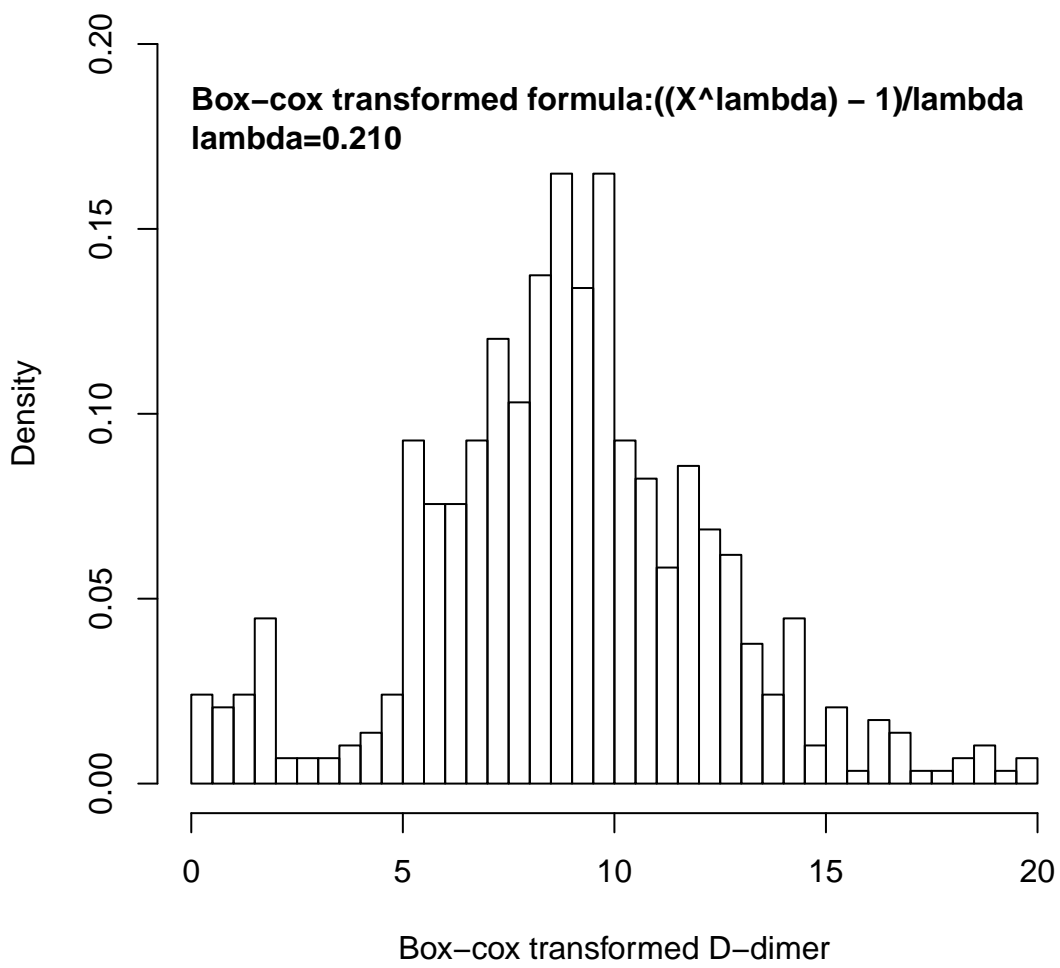

Supplement: Supplementary file 1 [file 75360c1bf7c71f8ce47d3b3a.pdf]
